# Supplementary material for: A genome-wide association study of chemotherapy-induced alopecia in breast cancer patients
Source: PubMed Central journal article supplement (PMC3978764; doi:10.1186/bcr3475), 2013-09-11
Supplement: bcr3475-S1.pdf [file bcr3475-S1.pdf]

**Supplementary Table 1 Patients' characteristics**

| Stage                          | Platform                   | Source                       | Age (Mean) | No. of samples |
|--------------------------------|----------------------------|------------------------------|------------|----------------|
| GWAS_All <sup>b</sup>          |                            |                              |            |                |
| ADR <sup>c</sup>               | Illimina Human OmniExpress | BioBank Japan                | 53.7       | 303            |
| Non-ADR <sup>d</sup>           | Illimina Human OmniExpress | BioBank Japan                | 58.0       | 880            |
| Combined analysis <sup>a</sup> |                            |                              |            |                |
| ADR                            | Invader assay              | Tokushima Breast Care Clinic | 51.4       | 23             |

<sup>a</sup>We collected case sample only. All patients received combination of docetaxel and cyclophosphamide

<sup>b</sup>Most of the patients received combination therapy

<sup>c</sup>Individuals who developed grade 2 alopecia

<sup>d</sup>Individuals who did not developed any ADRs after chemotherapy

| Category                                     | Grade2* | Grade1** | Grade0*** |
|----------------------------------------------|---------|----------|-----------|
| All                                          | 303     | 184      | 880       |
| Age (Mean)                                   | 53.7    | 53.4     | 58.0      |
| <b>Subgroup analysis</b>                     |         |          |           |
| Cyclophosphamide + Epirubicin +/- 5FU (CEF)  | 116     | 44       | 108       |
| Cyclophosphamide + Doxorubicin +/- 5FU (CAF) | 64      | 33       | 27        |
| Anti-microtubules treatment                  | 119     | 55       | 105       |
| Paclitaxel monotherapy                       | 57      | 36       | 63        |
| Doxorubicin monotherapy                      | 62      | 19       | 42        |

\* Individuals with grade 2 alopecia indicate complete hair loss after receiving chemotherapeutic agents

\*\* Individuals with grade 1 alopecia indicate partial hair loss after receiving chemotherapeutic agents

\*\*\* Individuals with grade 0 alopecia indicate no incidence of hair loss loss after receiving chemotherapeutic agents
