# Supplementary material for: A genome-wide association study of chemotherapy-induced alopecia in breast cancer patients
Source: PubMed Central journal article supplement (PMC3978764; doi:10.1186/bcr3475), 2013-09-11

# Additional file 2 Q-Q plot of GWAS

### All

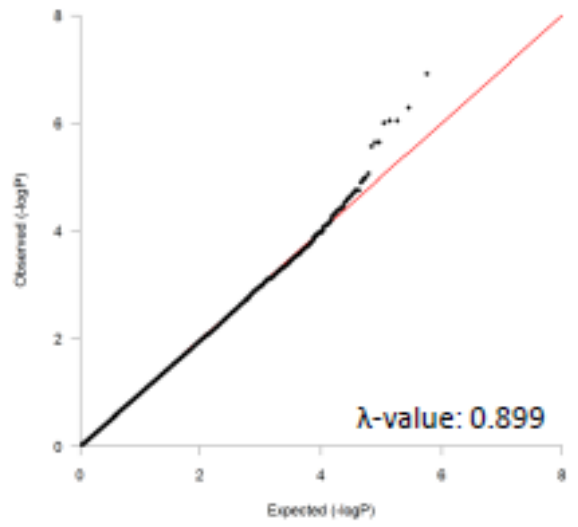

### CPA +EPI +/-5FU (CEF)

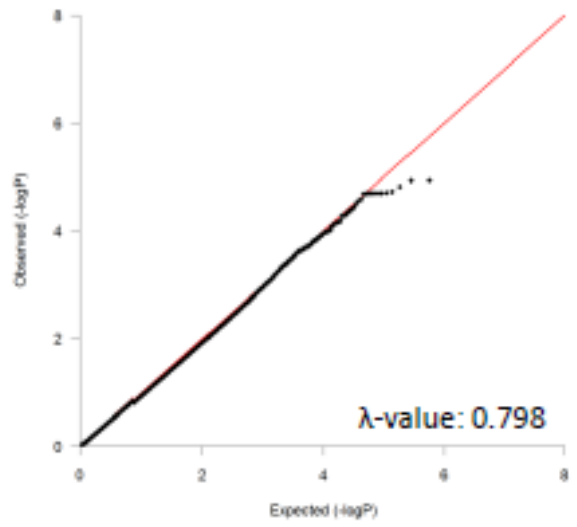

### CPA +DOX +/-5FU (CAF)

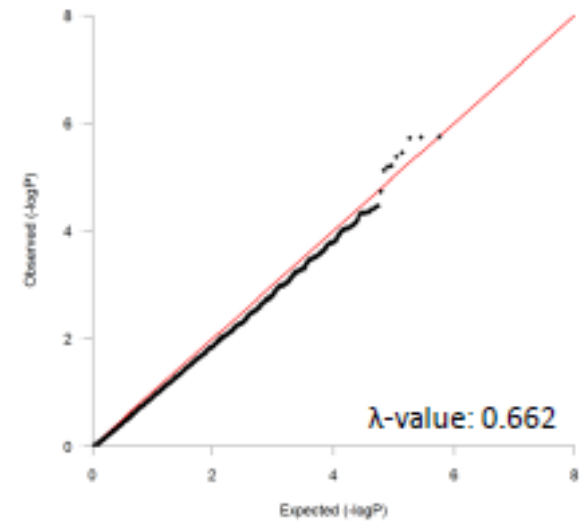

### Anti-microtubules (PTX/DOX)

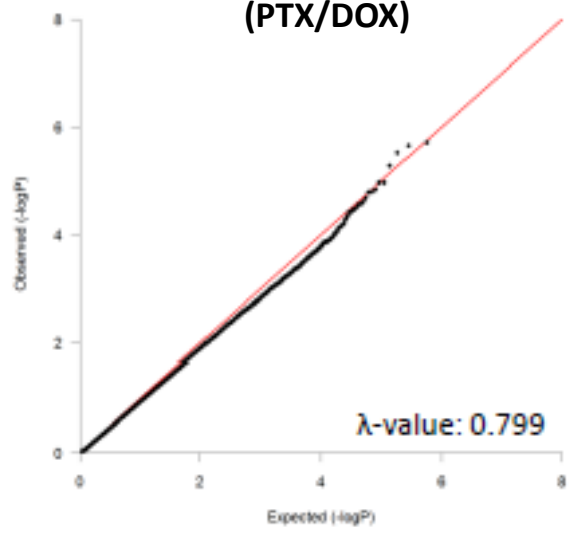

### Paclitaxel (PTX)

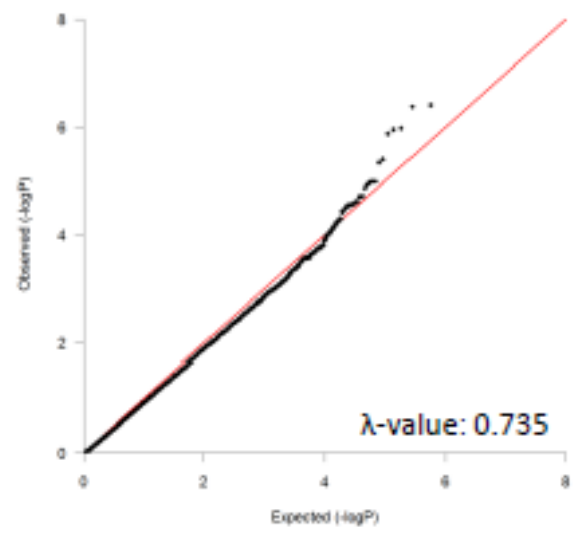

### Docetaxel (DOC)

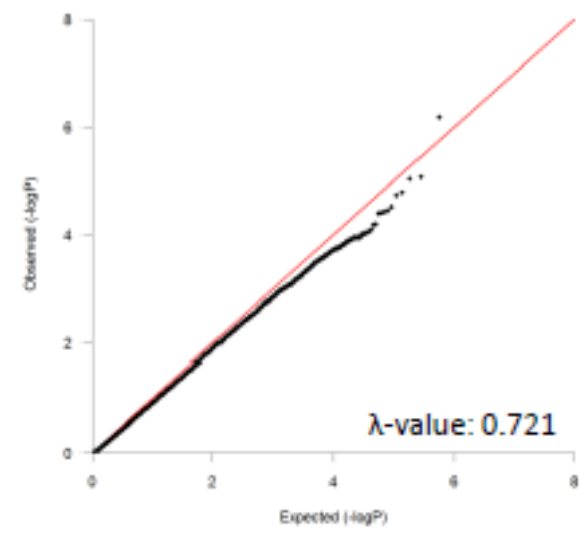

Supplement: bcr3475-S2.pdf [file bcr3475-S2.pdf]
