# Supplementary material for: A genome-wide association study of chemotherapy-induced alopecia in breast cancer patients
Source: PubMed Central journal article supplement (PMC3978764; doi:10.1186/bcr3475), 2013-09-11

# Additional file 3 Manhattan plot of GWAS for chemotherapy-induced alopecia in breast cancer

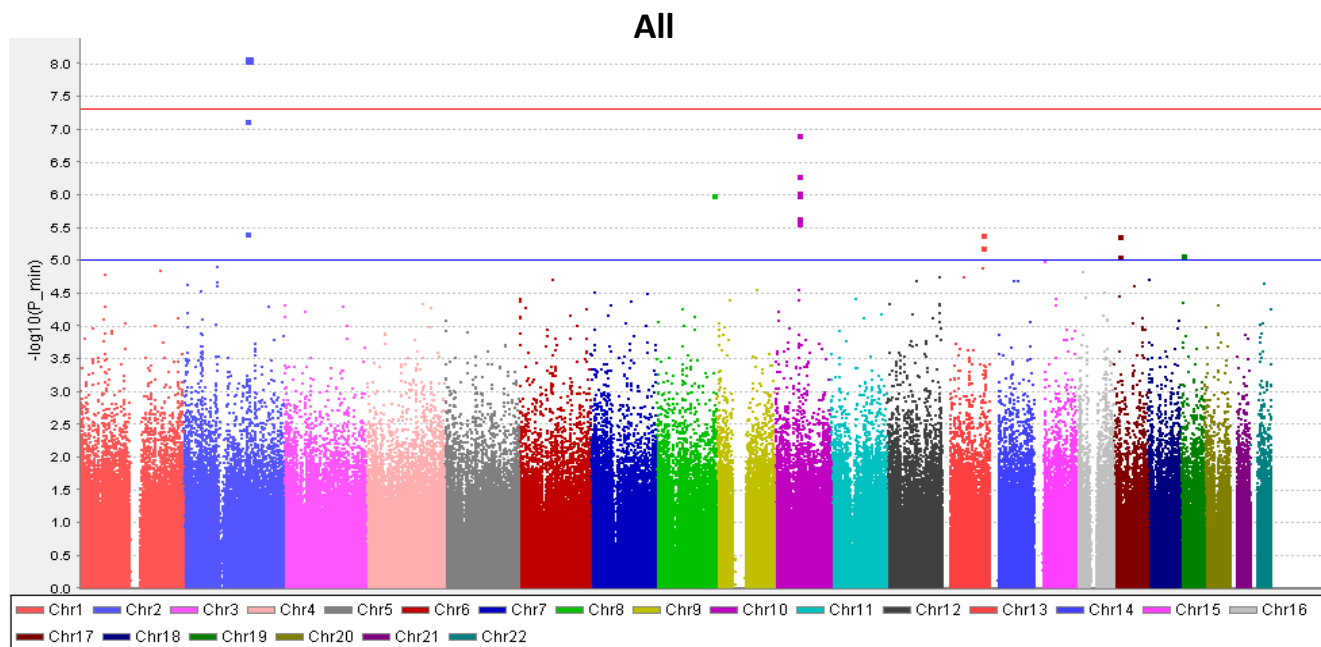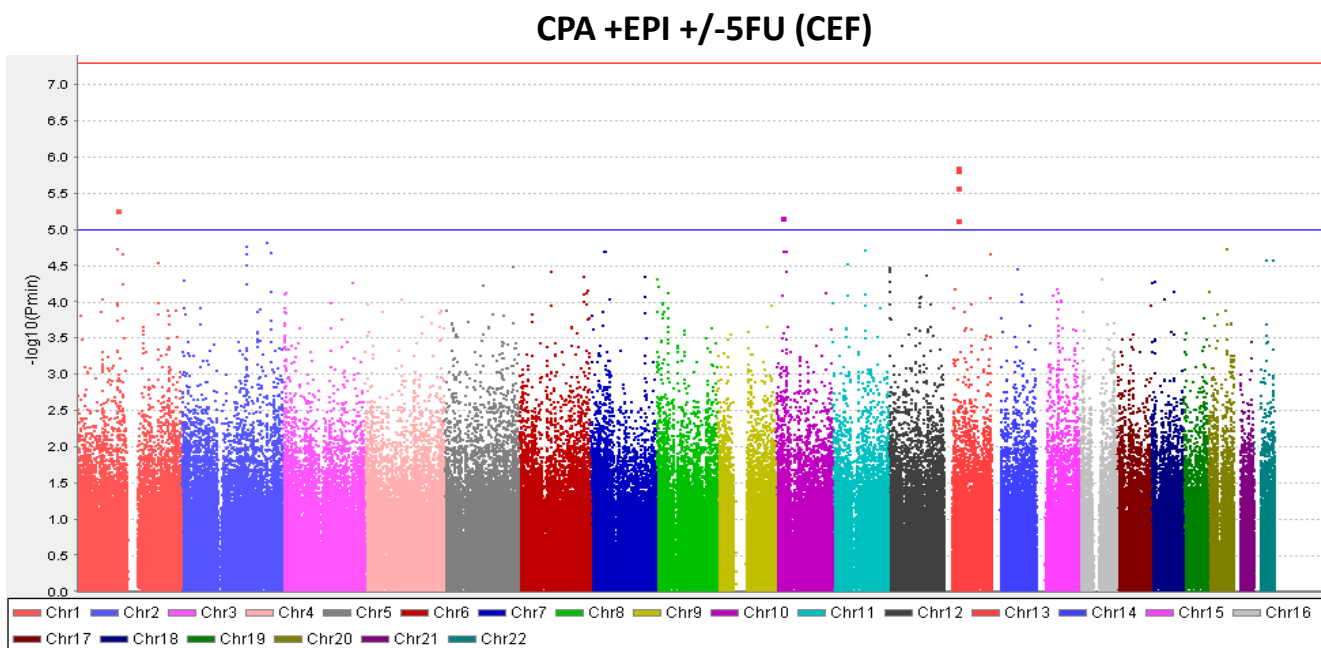

### CPA +DOX +/-5FU (CAF)

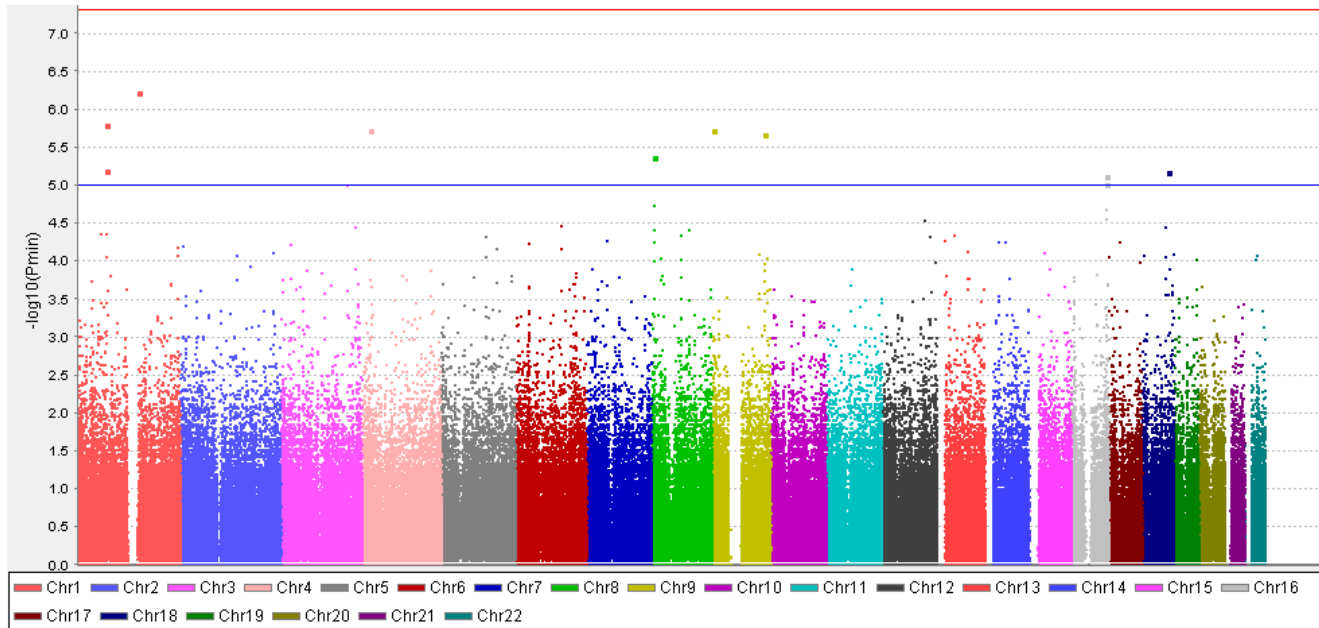

### Anti-microtubules (PTX/DOC)

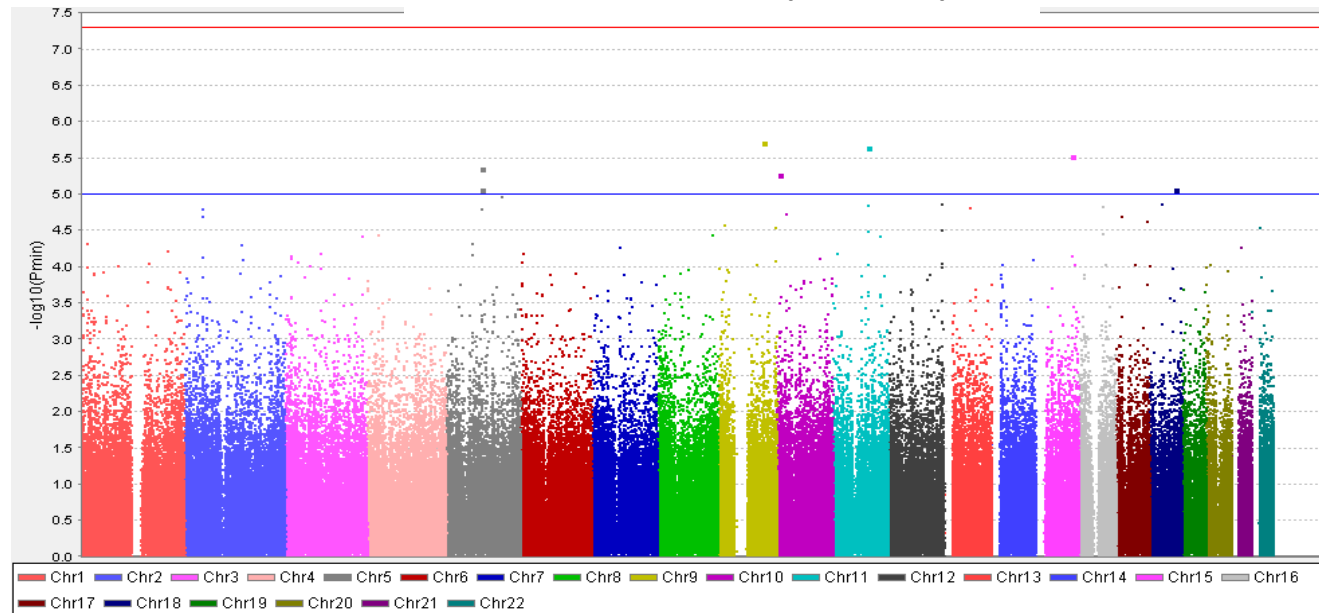

## Paclitaxel (PTX)

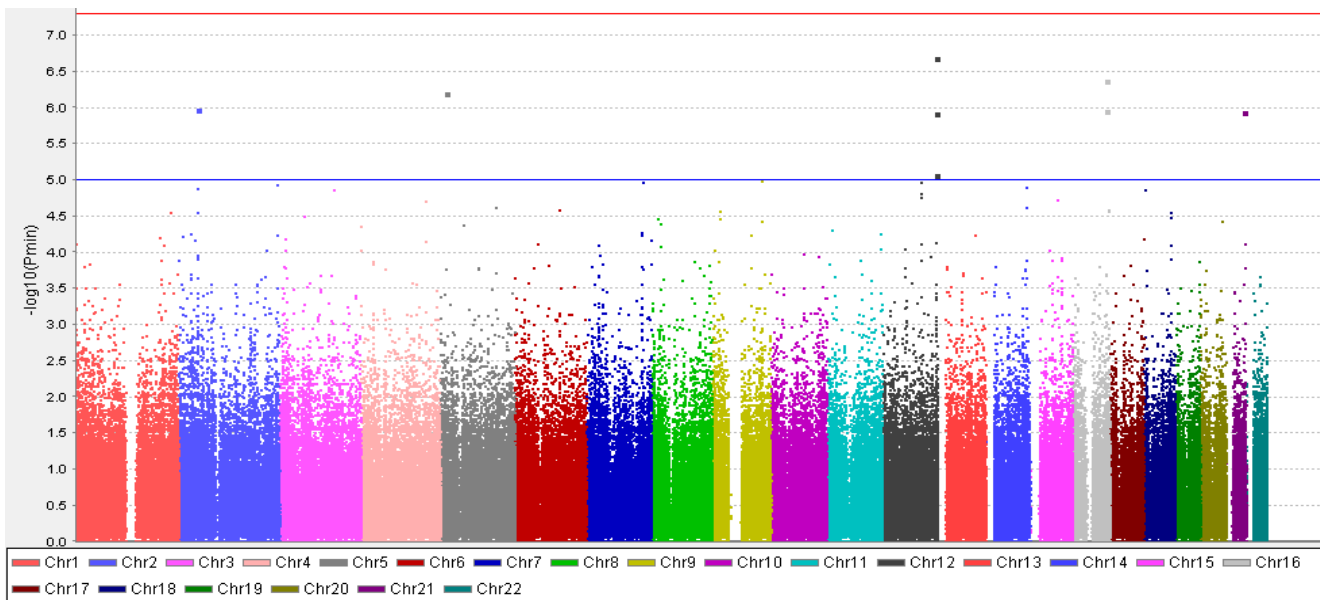

## Docetaxel (DOC)

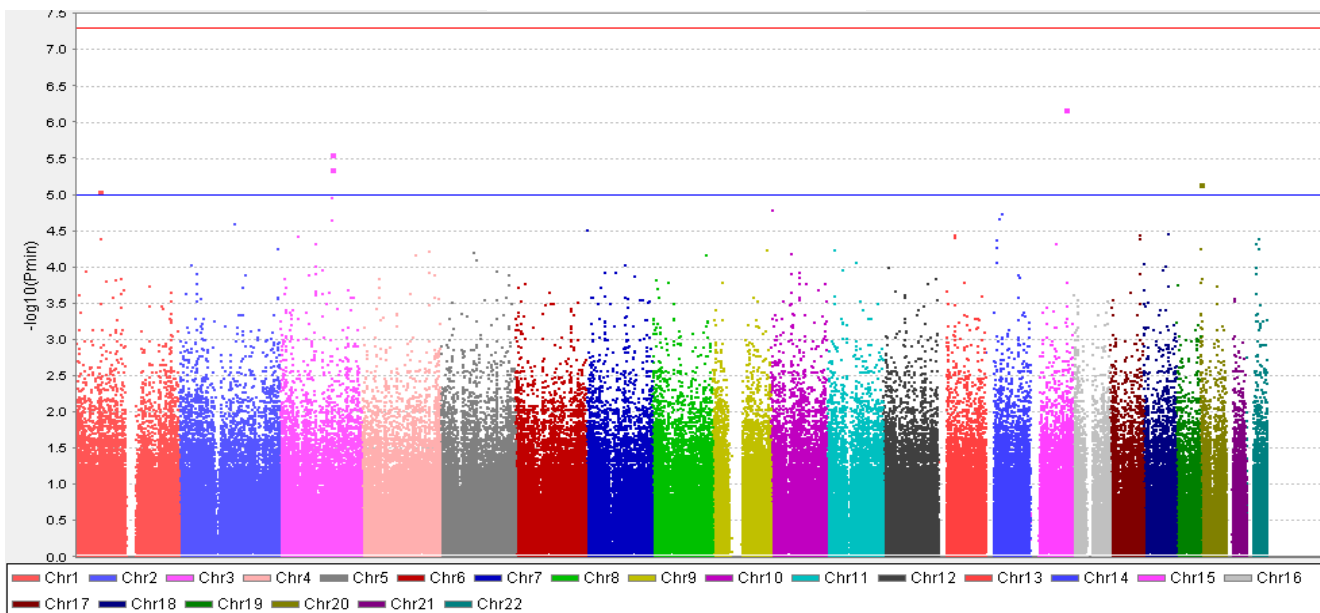

Supplement: bcr3475-S3.pdf [file bcr3475-S3.pdf]
