# Supplementary material for: A genome-wide association study of chemotherapy-induced alopecia in breast cancer patients
Source: PubMed Central journal article supplement (PMC3978764; doi:10.1186/bcr3475), 2013-09-11

# Additional file 4 Haplotype analysis

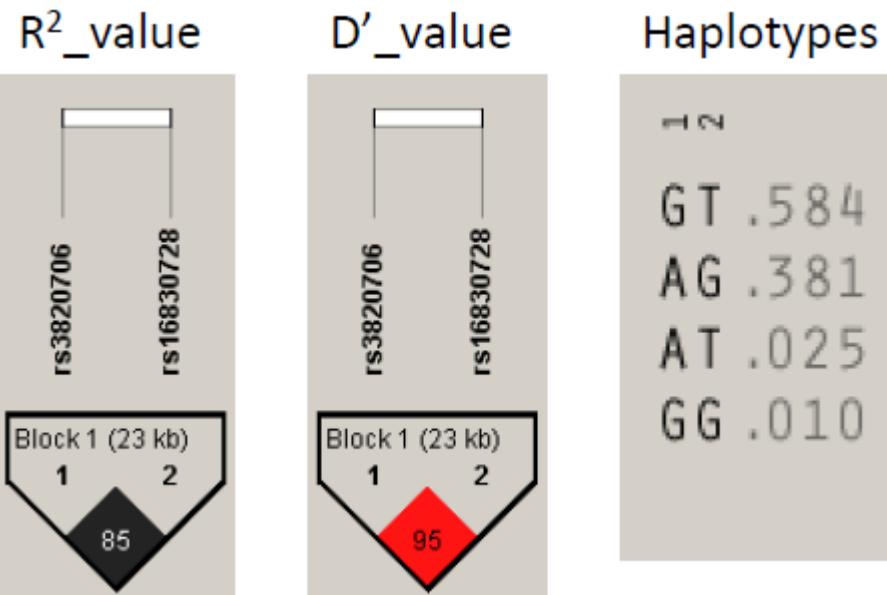

Supplement: bcr3475-S4.pdf [file bcr3475-S4.pdf]
