# Supplementary material for: A genome-wide association study of chemotherapy-induced alopecia in breast cancer patients
Source: PubMed Central journal article supplement (PMC3978764; doi:10.1186/bcr3475), 2013-09-11
Supplement: bcr3475-S5.pdf [file bcr3475-S5.pdf]

**Supplementary Table 2 Haplotype analysis of 2 SNPs**

| CHR | SNP        | BP        | A1 | A2 | MAF              |                      | P-value  |          |           |          | OR   | 95% CI      | Gene   | rel.loci |
|-----|------------|-----------|----|----|------------------|----------------------|----------|----------|-----------|----------|------|-------------|--------|----------|
|     |            |           |    |    | ADR <sup>a</sup> | Non-ADR <sup>b</sup> | allelic  | dominant | recessive | minimum  |      |             |        |          |
| 2   | rs3820706  | 152957411 | A  | G  | 0.34             | 0.43                 | 8.26E-05 | 1.07E-01 | 8.13E-09  | 8.13E-09 | 1.47 | (1.21-1.79) | CACNB4 | -1818    |
| 2   | rs16830728 | 152981335 | G  | T  | 0.33             | 0.41                 | 1.11E-04 | 6.16E-02 | 7.24E-08  | 7.24E-08 | 1.47 | (1.21-1.78) | STAM2  | 0        |

| Haplotype/SNP allele(s) | Haplotype frequencies | ADR, Non-ADR frequencies | P value  | OR*  | Effect     |
|-------------------------|-----------------------|--------------------------|----------|------|------------|
| GT                      | 0.58                  | 0.65, 0.37               | 5.91E-05 | 1.48 | Risk       |
| AG                      | 0.38                  | 0.32, 0.40               | 2.00E-04 | 0.69 | Protective |
| AT                      | 0.03                  | 0.02, 0.03               | 0.571    | 0.84 | Protective |
| GG                      | 0.01                  | 0.01, 0.01               | 0.6      | 0.77 | Protective |

SNP, single nucleotide polymorphism; ADR, adverse drug reaction; OR, odds ratio.

\*ORs are calculated using the nonrisk haplotype as reference

<sup>a</sup>Individuals who developed grade 2 alopecia.

<sup>b</sup>Individuals who did not developed any ADRs after chemotherapy.
