# Supplementary material for: A genome-wide association study of chemotherapy-induced alopecia in breast cancer patients
Source: PubMed Central journal article supplement (PMC3978764; doi:10.1186/bcr3475), 2013-09-11
Supplement: bcr3475-S6.pdf [file bcr3475-S6.pdf]

**Supplementary Table 3 Summary of GWAS for chemotherapy-induced alopecia with each drug subgroups ( $P < 10^{-6}$ )**

| Drug/drug subgroup            | CHR | SNP        | Gene                | Allele 1/2 (risk) | RAF              |                      | P-value  |          |           |          |                 |             |
|-------------------------------|-----|------------|---------------------|-------------------|------------------|----------------------|----------|----------|-----------|----------|-----------------|-------------|
|                               |     |            |                     |                   | ADR <sup>b</sup> | Non-ADR <sup>c</sup> | Allelic  | Dominant | Recessive | Pmin     | OR <sup>a</sup> | 95% CI      |
| CEF                           | 13  | rs3885907  | <i>ALOX5AP</i>      | G/T (G)           | 0.36             | 0.18                 | 1.17E-05 | 1.38E-06 | 1.70E-01  | 1.38E-06 | 2.66            | (1.71-4.13) |
|                               | 13  | rs9508835  | <i>ALOX5AP</i>      | T/G (T)           | 0.30             | 0.13                 | 1.16E-05 | 1.52E-06 | 4.48E-01  | 1.52E-06 | 2.90            | (1.78-4.72) |
|                               | 13  | rs10162089 | <i>ALOX5AP</i>      | T/C (T)           | 0.35             | 0.18                 | 4.26E-05 | 2.66E-06 | 3.78E-01  | 2.66E-06 | 2.51            | (1.62-3.91) |
|                               | 1   | rs4474258  | <i>LOC100130235</i> | G/A (A)           | 0.58             | 0.43                 | 1.21E-03 | 3.45E-01 | 5.29E-06  | 5.29E-06 | 1.89            | (1.29-2.75) |
|                               | 10  | rs7089227  | <i>PRPF18</i>       | G/T (G)           | 0.58             | 0.41                 | 3.34E-04 | 6.77E-06 | 2.80E-01  | 6.77E-06 | 1.99            | (1.37-2.90) |
|                               | 13  | rs4075692  | <i>ALOX5AP</i>      | A/G (A)           | 0.31             | 0.15                 | 5.08E-05 | 7.48E-06 | 4.48E-01  | 7.48E-06 | 2.59            | (1.62-4.13) |
|                               | 13  | rs9671124  | <i>ALOX5AP</i>      | T/C (T)           | 0.31             | 0.15                 | 5.08E-05 | 7.48E-06 | 4.48E-01  | 7.48E-06 | 2.59            | (1.62-4.13) |
| CAF                           | 1   | rs594206   | <i>BCL9</i>         | G/A (A)           | 0.99             | 0.78                 | 1.81E-06 | 5.91E-07 | 1.00E+00  | 5.91E-07 | 36.3            | (4.58-287)  |
|                               | 1   | rs672203   | <i>CTH</i>          | G/A (A)           | 0.85             | 0.52                 | 7.68E-06 | 1.62E-06 | 2.41E-02  | 1.62E-06 | 5.33            | (2.59-11.0) |
|                               | 9   | rs6475600  | <i>SMARCA2</i>      | T/C (C)           | 0.93             | 0.63                 | 1.86E-06 | 2.53E-06 | 7.66E-02  | 1.86E-06 | 7.78            | (3.25-18.6) |
|                               | 4   | rs6845621  | <i>LCORL</i>        | C/T (C)           | 0.59             | 0.20                 | 1.91E-06 | 3.47E-06 | 1.58E-02  | 1.91E-06 | 5.53            | (2.61-11.7) |
|                               | 9   | rs10818894 | <i>DENND1A</i>      | A/G (G)           | 0.96             | 0.70                 | 3.59E-06 | 2.16E-06 | 2.97E-01  | 2.16E-06 | 10.4            | (3.56-30.1) |
|                               | 8   | rs10112481 | <i>LOC100129861</i> | A/C (A)           | 0.59             | 0.22                 | 4.30E-06 | 8.72E-04 | 5.26E-05  | 4.30E-06 | 5.12            | (2.46-10.6) |
|                               | 1   | rs8179319  | <i>CTH</i>          | A/G (G)           | 0.84             | 0.50                 | 6.32E-06 | 6.92E-06 | 2.26E-02  | 6.32E-06 | 5.09            | (2.51-10.4) |
|                               | 18  | rs637644   | <i>CDH7</i>         | A/G (G)           | 0.99             | 0.80                 | 6.62E-06 | 4.80E-05 | 8.57E-02  | 6.62E-06 | 32.5            | (4.08-259)  |
|                               | 16  | rs11644424 | <i>CDH13</i>        | G/T (T)           | 0.73             | 0.44                 | 3.82E-04 | 7.58E-06 | 3.30E-01  | 7.58E-06 | 3.32            | (1.71-6.44) |
|                               | 16  | rs11860092 | <i>CDH13</i>        | G/A (A)           | 0.71             | 0.44                 | 1.25E-03 | 9.66E-06 | 4.42E-01  | 9.66E-06 | 3.07            | (1.59-5.94) |
| Anti-microtubule <sup>d</sup> | 9   | rs1858231  | <i>ZNF462</i>       | C/T (C)           | 0.43             | 0.22                 | 1.95E-06 | 2.35E-05 | 6.22E-05  | 1.95E-06 | 2.71            | (1.79-4.12) |
|                               | 11  | rs1870323  | <i>ME3</i>          | C/T (T)           | 0.84             | 0.64                 | 2.23E-06 | 1.59E-05 | 8.06E-04  | 2.23E-06 | 2.92            | (1.87-4.57) |
|                               | 15  | rs4262906  | <i>KLHL25</i>       | C/T (C)           | 0.57             | 0.35                 | 3.04E-06 | 1.99E-04 | 4.41E-04  | 3.04E-06 | 2.50            | (1.71-3.67) |
|                               | 5   | rs2471042  | <i>RPL10AP9</i>     | T/C (T)           | 0.40             | 0.21                 | 1.60E-05 | 4.47E-06 | 9.07E-02  | 4.47E-06 | 2.51            | (1.64-3.81) |
|                               | 10  | rs11255615 | <i>LOC100507143</i> | G/A (G)           | 0.59             | 0.38                 | 5.34E-06 | 9.77E-05 | 4.18E-04  | 5.34E-06 | 2.40            | (1.65-3.53) |
|                               | 5   | rs1493354  | <i>RPL10AP9</i>     | T/C (T)           | 0.40             | 0.22                 | 4.37E-05 | 8.53E-06 | 1.58E-01  | 8.53E-06 | 2.37            | (1.56-3.60) |
|                               | 5   | rs13161175 | <i>RPL10AP9</i>     | A/C (A)           | 0.40             | 0.21                 | 2.66E-05 | 8.53E-06 | 9.07E-02  | 8.53E-06 | 2.44            | (1.60-3.71) |
|                               | 18  | rs2032224  | <i>SERPINB5</i>     | C/A (A)           | 0.78             | 0.62                 | 2.71E-04 | 3.19E-02 | 8.75E-06  | 8.75E-06 | 2.16            | (1.42-3.27) |
| Paclitaxel_mono               | 12  | rs11059635 | <i>TMEM132C</i>     | A/G (G)           | 0.93             | 0.67                 | 3.91E-07 | 2.05E-07 | 1.21E-01  | 2.05E-07 | 6.63            | (2.95-14.9) |
|                               | 16  | rs3844412  | <i>CDH13</i>        | A/G (A)           | 0.40             | 0.11                 | 4.20E-07 | 4.42E-07 | 9.94E-03  | 4.20E-07 | 5.22            | (2.67-10.2) |
|                               | 5   | rs163818   | <i>TRIO</i>         | C/T (C)           | 0.22             | 0.02                 | 1.35E-06 | 6.40E-07 | 4.75E-01  | 6.40E-07 | 11.5            | (3.37-39.3) |
|                               | 2   | rs698813   | <i>C2orf34</i>      | T/C (C)           | 0.83             | 0.52                 | 1.06E-06 | 1.08E-04 | 1.23E-04  | 1.06E-06 | 4.27            | (2.35-7.76) |
|                               | 16  | rs4783238  | <i>CDH13</i>        | A/C (A)           | 0.40             | 0.12                 | 1.12E-06 | 3.13E-06 | 4.44E-03  | 1.12E-06 | 4.83            | (2.50-9.31) |
|                               | 21  | rs2838088  | <i>NCRNA00111</i>   | A/G (A)           | 0.38             | 0.12                 | 4.04E-06 | 1.15E-06 | 1.01E-01  | 1.15E-06 | 4.48            | (2.32-8.66) |

|                |    |            |                     |         |      |      |          |          |          |          |      |             |
|----------------|----|------------|---------------------|---------|------|------|----------|----------|----------|----------|------|-------------|
|                | 12 | rs11059618 | <i>TMEM132C</i>     | G/A (A) | 0.89 | 0.63 | 4.63E-06 | 1.18E-06 | 1.20E-01 | 1.18E-06 | 4.58 | (2.32-9.07) |
|                | 12 | rs10773519 | <i>TMEM132C</i>     | G/A (A) | 0.83 | 0.58 | 1.98E-05 | 8.41E-06 | 6.39E-02 | 8.41E-06 | 3.63 | (1.98-6.66) |
| Docetaxel_mono | 15 | rs4262906  | <i>KLHL25</i>       | C/T (C) | 0.66 | 0.31 | 6.62E-07 | 1.72E-04 | 3.34E-04 | 6.62E-07 | 4.36 | (2.41-7.89) |
|                | 3  | rs4234284  | <i>C3orf56</i>      | T/C (T) | 0.47 | 0.23 | 4.32E-04 | 2.78E-06 | 1.00E+00 | 2.78E-06 | 3.01 | (1.62-5.60) |
|                | 3  | rs13095826 | <i>C3orf56</i>      | G/T (G) | 0.48 | 0.24 | 7.57E-04 | 4.49E-06 | 1.00E+00 | 4.49E-06 | 2.91 | (1.57-5.36) |
|                | 20 | rs6117615  | <i>C20orf54</i>     | C/T (C) | 0.55 | 0.24 | 8.53E-06 | 7.14E-06 | 2.77E-02 | 7.14E-06 | 3.89 | (2.10-7.18) |
|                | 1  | rs10443215 | <i>LOC100507652</i> | C/T (C) | 0.26 | 0.04 | 9.21E-06 | 1.01E-05 | 2.71E-01 | 9.21E-06 | 9.39 | (2.77-31.8) |

CEF, cyclophosphamide+epirubicin+/-5FU; CAF, cyclophosphamide+doxorubicin+/-5FU; CHR, chromosome; SNP, single nucleotide polymorphism; ADR, adverse drug reaction; RAF, risk allele frequency; OR, odds ratio; CI, confidence interval.

<sup>a</sup>ORs and CIs are calculated using the nonrisk genotype as reference.

<sup>b</sup>Individuals who developed grade 2 alopecia.

<sup>c</sup>Individuals who did not developed any ADRs after chemotherapy.

<sup>d</sup>Paclitaxel and docetaxel administrated samples.
