# Supplementary material for: A genome-wide association study of chemotherapy-induced alopecia in breast cancer patients
Source: PubMed Central journal article supplement (PMC3978764; doi:10.1186/bcr3475), 2013-09-11
Supplement: bcr3475-S7.pdf [file bcr3475-S7.pdf]

**Supplementary Table 4 Association of rs3820706 in subgroups**

| CHR | SNP       | Gene   | A1 | A2 | Subgroup                      | RAF              |                      | P-value  |          |           |          | OR <sup>a</sup> | 95% CI      |
|-----|-----------|--------|----|----|-------------------------------|------------------|----------------------|----------|----------|-----------|----------|-----------------|-------------|
|     |           |        |    |    |                               | ADR <sup>b</sup> | Non-ADR <sup>c</sup> | allelic  | dominant | recessive | minimum  |                 |             |
| 2   | rs3820706 | CACNB4 | A  | G  | ALL                           | 0.66             | 0.57                 | 8.26E-05 | 1.07E-01 | 8.13E-09  | 8.13E-09 | 1.47            | (1.21-1.79) |
|     |           |        |    |    | CEF                           | 0.64             | 0.51                 | 5.45E-03 | 1.16E-01 | 1.10E-03  | 1.10E-03 | 1.73            | (1.19-2.53) |
|     |           |        |    |    | CAF                           | 0.67             | 0.54                 | 9.45E-02 | 6.39E-01 | 1.41E-02  | 1.41E-02 | 1.76            | (0.92-3.38) |
|     |           |        |    |    | Anti-microtubule <sup>d</sup> | 0.63             | 0.56                 | 1.02E-01 | 2.51E-01 | 9.93E-02  | 9.93E-02 | 1.38            | (0.94-2.02) |
|     |           |        |    |    | DOC mono                      | 0.67             | 0.56                 | 1.12E-01 | 1.49E-01 | 3.09E-01  | 1.12E-01 | 1.59            | (0.90-2.82) |
|     |           |        |    |    | PTX mono                      | 0.60             | 0.56                 | 6.01E-01 | 1.00E+00 | 3.07E-01  | 3.07E-01 | 1.18            | (0.71-1.98) |

CEF, cyclophosphamide+epirubicin+/-5FU; CAF, cyclophosphamide+doxorubicin+/-5FU; CHR, chromosome; SNP, single nucleotide polymorphism; ADR, adverse drug reaction; RAF, risk allele frequency; OR, odds ratio; CI, confidence interval.

<sup>a</sup>ORs and CIs are calculated using the nonrisk genotype as reference.

<sup>b</sup>Individuals who developed grade 2 alopecia.

<sup>c</sup>Individuals who did not developed any ADRs after chemotherapy.

<sup>d</sup>Paclitaxel and docetaxel administrated samples.
