# Supplementary material for: A genome-wide association study of chemotherapy-induced alopecia in breast cancer patients
Source: PubMed Central journal article supplement (PMC3978764; doi:10.1186/bcr3475), 2013-09-11
Supplement: bcr3475-S8.pdf [file bcr3475-S8.pdf]

Supplementary Table 5 wGRS of each GWAS for chemotherapy-induced alopecia

**All (8 SNPs)**

| Cat | Score     | ADR <sup>a</sup> | Non-ADR <sup>b</sup> | %_ADR | %_Non-ADR | OR <sup>c</sup> | 95%_CI    | P-value  | Sensitivity | Specificity |
|-----|-----------|------------------|----------------------|-------|-----------|-----------------|-----------|----------|-------------|-------------|
| 1   | <5.54     | 17               | 173                  | 0.06  | 0.20      |                 |           | REF      |             |             |
| 2   | 5.54-6.84 | 46               | 251                  | 0.15  | 0.29      | <b>1.87</b>     | 1.04-3.36 | 3.83E-02 | 0.73        | 0.41        |
| 3   | 6.84-8.22 | 186              | 426                  | 0.61  | 0.49      | <b>4.44</b>     | 2.62-7.53 | 3.44E-09 | 0.92        | 0.29        |
| 4   | >8.22     | 54               | 28                   | 0.18  | 0.03      | <b>19.6</b>     | 9.99-38.6 | 1.44E-21 | 0.76        | 0.86        |
|     |           | 303              | 878                  | 1.00  | 1.00      |                 |           |          |             |             |

**CEF (4 SNPs)**

| Cat | Score     | ADR | Non-ADR | %_ADR | %_Non-ADR | OR          | 95%_CI    | P-value  | Sensitivity | Specificity |
|-----|-----------|-----|---------|-------|-----------|-------------|-----------|----------|-------------|-------------|
| 1   | <1.94     | 4   | 47      | 0.03  | 0.44      |             |           | REF      |             |             |
| 2   | 1.94-3.54 | 40  | 33      | 0.35  | 0.31      | <b>14.2</b> | 4.65-43.7 | 3.51E-08 | 0.91        | 0.59        |
| 3   | 3.54-5.15 | 28  | 20      | 0.24  | 0.19      | <b>16.5</b> | 5.10-53.1 | 7.47E-08 | 0.88        | 0.70        |
| 4   | >5.15     | 44  | 6       | 0.38  | 0.06      | <b>86.2</b> | 22.8-326  | 2.46E-17 | 0.92        | 0.89        |
|     |           | 116 | 106     | 1.00  | 1.00      |             |           |          |             |             |

**CAF (8 SNPs)**

| Cat | Score     | ADR | Non-ADR | %_ADR | %_Non-ADR | OR           | 95%_CI     | P-value  | Sensitivity | Specificity |
|-----|-----------|-----|---------|-------|-----------|--------------|------------|----------|-------------|-------------|
| 1   | <15.3     | 0   | 16      | 0.00  | 0.59      |              |            | REF      |             |             |
| 2   | 15.3-21.2 | 9   | 10      | 0.14  | 0.37      | <b>29.9*</b> | 1.57-569   | 1.98E-03 | 1.00        | 0.62        |
| 3   | 21.2-27.1 | 42  | 1       | 0.66  | 0.04      | <b>935*</b>  | 36.2-24100 | 3.35E-14 | 1.00        | 0.94        |
| 4   | >27.1     | 13  | 0       | 0.20  | 0.00      | <b>891*</b>  | 16.6-47900 | 3.77E-09 | 1.00        | 1.00        |
|     |           | 64  | 27      | 1.00  | 1.00      |              |            |          |             |             |

**Anti-microtubules (6 SNPs)**

| Cat | Score     | ADR | Non-ADR | %_ADR | %_Non-ADR | OR          | 95%_CI   | P-value  | Sensitivity | Specificity |
|-----|-----------|-----|---------|-------|-----------|-------------|----------|----------|-------------|-------------|
| 1   | <5.51     | 1   | 33      | 0.01  | 0.31      |             |          | REF      |             |             |
| 2   | 5.51-7.59 | 26  | 52      | 0.22  | 0.50      | <b>16.5</b> | 2.14-128 | 5.13E-04 | 0.96        | 0.39        |
| 3   | 7.59-9.68 | 65  | 19      | 0.55  | 0.18      | <b>113</b>  | 14.5-881 | 1.06E-14 | 0.99        | 0.64        |

|   |       |     |     |      |      |            |            |          |      |      |
|---|-------|-----|-----|------|------|------------|------------|----------|------|------|
| 4 | >9.68 | 26  | 1   | 0.22 | 0.01 | <b>858</b> | 51.2-14400 | 5.82E-15 | 0.96 | 0.97 |
|   |       | 118 | 105 | 1.00 | 1.00 |            |            |          |      |      |

#### Paclitaxel (7 SNPs)

| Cat | Score     | ADR | Non-ADR | %_ADR | %_Non-ADR | OR           | 95%_CI     | P-value  | Sensitivity | Specificity |
|-----|-----------|-----|---------|-------|-----------|--------------|------------|----------|-------------|-------------|
| 1   | >3.02     | 0   | 25      | 0.00  | 0.41      |              |            | REF      |             |             |
| 2   | 3.02-7.48 | 6   | 25      | 0.11  | 0.41      | <b>13.0*</b> | 0.70-243   | 6.28E-02 | 1.00        | 0.50        |
| 3   | 7.48-11.9 | 35  | 11      | 0.61  | 0.18      | <b>157*</b>  | 8.87-2800  | 7.87E-11 | 1.00        | 0.69        |
| 4   | >11.9     | 16  | 0       | 0.28  | 0.00      | <b>1680*</b> | 31.8-89100 | 9.70E-12 | 1.00        | 1.00        |
|     |           | 57  | 61      | 1.00  | 1.00      |              |            |          |             |             |

#### Docetaxel (4 SNPs)

| Cat | Score     | ADR | Non-ADR | %_ADR | %_Non-ADR | OR          | 95%_CI     | P-value  | Sensitivity | Specificity |
|-----|-----------|-----|---------|-------|-----------|-------------|------------|----------|-------------|-------------|
| 1   | <2.26     | 1   | 24      | 0.02  | 0.57      |             |            | REF      |             |             |
| 2   | 2.26-4.78 | 9   | 14      | 0.15  | 0.33      | <b>15.4</b> | 1.76-135   | 3.80E-03 | 0.90        | 0.63        |
| 3   | 4.78-7.29 | 39  | 4       | 0.63  | 0.10      | <b>234</b>  | 24.7-2220  | 3.11E-13 | 0.98        | 0.86        |
| 4   | >7.29     | 13  | 0       | 0.21  | 0.00      | <b>441*</b> | 16.8-11600 | 6.46E-10 | 0.93        | 1.00        |
|     |           | 62  | 42      | 1.00  | 1.00      |             |            |          |             |             |

\* OR calculated after Haldane's correction: adding 0.5 to all the cells of a contingency table if any of the cell expectations would cause a division by zero error.

Cat, category; CEF, cyclophosphamide+epirubicin+/-5FU; CAF, cyclophosphamide+doxorubicin+/-5FU; ADR, adverse drug reaction; OR, odds ratio; CI, confidence interval; REF, reference.

<sup>a</sup>Individuals who developed grade 2 alopecia.

<sup>b</sup>Individuals who did not developed any ADRs after chemotherapy.

<sup>c</sup>ORs and Cis are calculated using category (group) 1 as reference.
