# Supplementary material for: A genome-wide association study of chemotherapy-induced alopecia in breast cancer patients
Source: PubMed Central journal article supplement (PMC3978764; doi:10.1186/bcr3475), 2013-09-11
Supplement: bcr3475-S9.pdf [file bcr3475-S9.pdf]

**Supplementary Table 6 wGRS results of all, CAF and CEF-induced alopecia**

| <b>ALL (8 SNPs)</b> |              |                       |                       |                       |             |             |             | <b>G2 vs G0</b>        |               |                | <b>G1 vs G0</b>        |               |                |
|---------------------|--------------|-----------------------|-----------------------|-----------------------|-------------|-------------|-------------|------------------------|---------------|----------------|------------------------|---------------|----------------|
| <b>Cat</b>          | <b>Score</b> | <b>G2<sup>a</sup></b> | <b>G1<sup>b</sup></b> | <b>G0<sup>c</sup></b> | <b>%_G2</b> | <b>%_G1</b> | <b>%_G0</b> | <b>OR<sup>d*</sup></b> | <b>95%_CI</b> | <b>P-value</b> | <b>OR<sup>d*</sup></b> | <b>95%_CI</b> | <b>P-value</b> |
| 1                   | <5.45        | 17                    | 28                    | 167                   | 0.08        | 0.13        | 0.79        |                        | Ref           |                |                        | Ref           |                |
| 2                   | 5.45-6.83    | 46                    | 52                    | 242                   | 0.14        | 0.15        | 0.71        | 1.87                   | 1.04-3.37     | 3.79E-02       | 1.28                   | 0.78-2.11     | 3.83E-01       |
| 3                   | 6.83-8.21    | 186                   | 66                    | 417                   | 0.28        | 0.10        | 0.62        | 4.38                   | 2.58-7.43     | 1.11E-08       | 0.94                   | 0.59-1.52     | 9.02E-01       |
| 4                   | >8.21        | 54                    | 10                    | 26                    | 0.60        | 0.11        | 0.29        | 20.4                   | 10.3-40.4     | 1.08E-21       | 2.29                   | 1.00-5.27     | 5.34E-02       |
| <b>Total</b>        |              | <b>303</b>            | <b>156</b>            | <b>852</b>            |             |             |             |                        |               |                |                        |               |                |

  

| <b>ACF (8 SNPs)</b> |              |           |           |           |             |             |             | <b>G2 vs G0</b> |               |                | <b>G1 vs G0</b> |               |                |
|---------------------|--------------|-----------|-----------|-----------|-------------|-------------|-------------|-----------------|---------------|----------------|-----------------|---------------|----------------|
| <b>Cat</b>          | <b>Score</b> | <b>G2</b> | <b>G1</b> | <b>G0</b> | <b>%_G2</b> | <b>%_G1</b> | <b>%_G0</b> | <b>OR</b>       | <b>95%_CI</b> | <b>P-value</b> | <b>OR</b>       | <b>95%_CI</b> | <b>P-value</b> |
| 1                   | <15.6        | 0         | 3         | 18        | 0.00        | 0.14        | 0.86        |                 | Ref           |                |                 | Ref           |                |
| 2                   | 15.6-21.1    | 8         | 13        | 8         | 0.28        | 0.45        | 0.28        | 37              | 1.91-718      | 7.09E-04       | 9.75            | 1.27-3.99     | 3.56E-03       |
| 3                   | 21.1-26.6    | 42        | 14        | 1         | 0.74        | 0.25        | 0.02        | 1048            | 40.8-26953    | 1.45E-14       | 84              | 7.86-897      | 3.04E-06       |
| 4                   | >26.6        | 14        | 3         | 0         | 0.82        | 0.18        | 0.00        | 1073            | 20.1-57414    | 2.12E-09       | 37              | 1.55-886      | 9.81E-03       |
| <b>Total</b>        |              | <b>64</b> | <b>33</b> | <b>27</b> |             |             |             |                 |               |                |                 |               |                |

  

| <b>CEF (4 SNPs)</b> |              |            |           |           |             |             |             | <b>G2 vs G0</b> |               |                | <b>G1 vs G0</b> |               |                |
|---------------------|--------------|------------|-----------|-----------|-------------|-------------|-------------|-----------------|---------------|----------------|-----------------|---------------|----------------|
| <b>Cat</b>          | <b>Score</b> | <b>G2</b>  | <b>G1</b> | <b>G0</b> | <b>%_G2</b> | <b>%_G1</b> | <b>%_G0</b> | <b>OR</b>       | <b>95%_CI</b> | <b>P-value</b> | <b>OR</b>       | <b>95%_CI</b> | <b>P-value</b> |
| 1                   | <1.96        | 4          | 9         | 5         | 0.22        | 0.50        | 0.28        |                 | Ref           |                |                 | Ref           |                |
| 2                   | 1.96-3.54    | 40         | 14        | 31        | 0.47        | 0.16        | 0.36        | 1.61            | 0.40-6.51     | 7.24E-01       | 0.251           | 0.07-0.89     | 3.33E-02       |
| 3                   | 3.54-5.12    | 28         | 10        | 20        | 0.48        | 0.17        | 0.34        | 1.75            | 0.42-7.35     | 4.85E-01       | 0.278           | 0.07-1.05     | 1.01E-01       |
| 4                   | >5.12        | 44         | 6         | 4         | 0.81        | 0.11        | 0.07        | 13.8            | 2.60-72.8     | 2.89E-03       | 0.833           | 0.16-4.44     | 1.00E+00       |
| <b>Total</b>        |              | <b>116</b> | <b>39</b> | <b>60</b> |             |             |             |                 |               |                |                 |               |                |

\* OR calculated after Haldane's correction: adding 0.5 to all the cells of a contingency table if any of the cell expectations would cause a division by zero error.

Cat, category; OR, odds ratio; CI, confidence interval; REF, reference.

<sup>a</sup>Individuals who developed grade 2 alopecia.

<sup>b</sup>Individuals who developed grade 1 alopecia.

<sup>c</sup>Individuals who did not developed any ADRs after chemotherapy.

<sup>d</sup>ORs and CIs are calculated using category (group) 1 as reference.
